# Supplementary material
Source: Springer Nature journal article supplement (https://www.springermedizin.de/resource/supplementary/12967_2009_406_MOESM2_ESM.pdf/9576402)
Supplement: MOESM2 [file 9576402]

**1) Pre-Operative Consent**

**2) Post-Operative Consent**

90 day period

Identifiable Biospecimen

Anonymized Biospecimen

#1

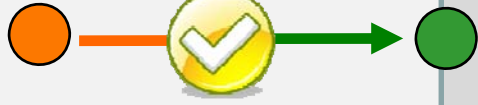

**Consent:**  
Accomplished

#2

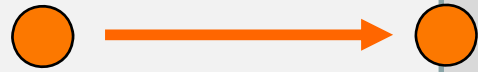

**Consent:**  
Accomplished

**Consent:**  
Not accomplished

**Consent:**  
Withheld

Biospecimen destroyed

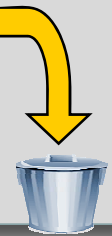

Day 0 (Biospecimen collected)

Day 90
